# Supplementary material for: Effect of deinstitutionalisation for adults with intellectual disabilities on costs: a systematic review
Source: PubMed Central journal article supplement — BMJ Open. 2019 Sep 20;9(9):e025736. doi: 10.1136/bmjopen-2018-025736 (PMC6756329; doi:10.1136/bmjopen-2018-025736), 2019-09-20
Supplement: bmjopen-2018-025736supp001.pdf [file bmjopen-2018-025736supp001.pdf]

### Appendix 1 Search strategy

We searched seven databases for studies of deinstitutionalisation for people with intellectual disabilities, specifically evaluating effects on economic outcomes and quality of life (see main article).

We executed a search with four categories of terms and controlled vocabulary:

- Category 1: Intervention
- Category 2: Intellectual disability
- Category 3: Quality of life
- Category 4: Economic outcomes

With respect to the intervention, no standardised terminology exists for the concept of deinstitutionalisation/decongregation but attempts in piloting to capture concepts of “movement” and its synonyms led to poorly specified searches returning large numbers of irrelevant studies. Category 1 in our search strategy (**Error! Reference source not found.**) therefore includes not only vocabulary related to transitions but also different categories of residence (e.g. hospital, home).

Similarly with respect to population, the language used in describing people with intellectual disability has changed profoundly over the last 50 years.

Category 2 choices are therefore intended to capture current and historic terminology. In specifying language for Category 3 (quality of life) in our search

strategy we considered multiple approaches, including use of domains from well-established frameworks for quality-of-life concepts. However pilot searches suggested that this approach led to large numbers of studies with low relevance. We therefore used 'quality of life', closely related terms such as 'life quality', and the related but distinct term 'adaptive behaviour', which has a prominent history in this field. In Category 4 (economics) we selected both terms for resource use and terms for economic evaluation.

Supplementary Table presents the search terms with search strings as an example of the executed searches - in this case, using MEDLINE (Ebsco). The separate strings were combined using Boolean operators as follows: 1 AND 2 AND (3 OR 4).

## Supplementary Table Search terms, example using MEDLINE

|   | Term                                        | Search terms                                                                                                                                                                                                                                                                                                                                                                                                                                                                                                                                                                                                                                                                                                                                                                                                                                                                                                                                                                                                                                                                                                                                                                                                                                                                                                                                                                                                                                                                                                                                                             |
|---|---------------------------------------------|--------------------------------------------------------------------------------------------------------------------------------------------------------------------------------------------------------------------------------------------------------------------------------------------------------------------------------------------------------------------------------------------------------------------------------------------------------------------------------------------------------------------------------------------------------------------------------------------------------------------------------------------------------------------------------------------------------------------------------------------------------------------------------------------------------------------------------------------------------------------------------------------------------------------------------------------------------------------------------------------------------------------------------------------------------------------------------------------------------------------------------------------------------------------------------------------------------------------------------------------------------------------------------------------------------------------------------------------------------------------------------------------------------------------------------------------------------------------------------------------------------------------------------------------------------------------------|
| 1 | <b>Living arrangement/<br/>setting type</b> | MH("Housing" OR "Group Homes" OR "Nursing Homes" OR "Residence Characteristics" OR "Residential Facilities" OR "Deinstitutionalization" OR "Institutionalization" OR "Hospitals, Psychiatric") OR TI(House OR houses OR housed OR housing OR home OR homes OR domicile OR dwelling OR communit* OR apartment* OR hospital* OR asylum* OR accommodation OR "independent living" OR "semi-independent" OR institutional* OR institution OR institutions OR noninstitutional* OR deinstitutional* OR residence OR residential OR nonresidential OR congregat* OR decongregat* OR "family care" OR "social model" OR "service model" OR placement OR transition* OR campus OR forensic OR prison* OR reinstitutional* OR transinstitutional* OR cluster* OR personalised OR personalized OR "step down facility" OR "step-down facility" OR "supported living" OR relocat* OR resettl*) OR AB(House OR houses OR housed OR housing OR home OR homes OR domicile OR dwelling OR communit* OR apartment* OR hospital* OR asylum* OR accommodation OR "independent living" OR "semi-independent" OR institutional* OR institution OR institutions OR noninstitutional* OR deinstitutional* OR residence OR residential OR nonresidential OR congregat* OR decongregat* OR "family care" OR "social model" OR "service model" OR placement OR transition* OR campus OR forensic OR prison* OR reinstitutional* OR transinstitutional* OR cluster* OR personalised OR personalized OR "step down facility" OR "step-down facility" OR "supported living" OR relocat* OR resettl*) |
| 2 | <b>Disability</b>                           | MH("Intellectual Disability" OR "Developmental Disabilities") OR TI("Intellectual* disab*" OR "developmental* disab*" OR "learning disab*" OR "mental* retard*" OR "mental* handicap*" OR "intellectual* impair*" OR "IDD" OR "intellectual developmental disorder") OR AB("Intellectual* disab*" OR "developmental* disab*" OR "learning disab*" OR "mental* retard*" OR "mental* handicap*" OR "intellectual* impair*" OR "IDD" OR "intellectual developmental disorder")                                                                                                                                                                                                                                                                                                                                                                                                                                                                                                                                                                                                                                                                                                                                                                                                                                                                                                                                                                                                                                                                                              |
| 3 | <b>Quality of life</b>                      | MH("Adaptation, Psychological" OR "Quality of Life") OR TI(" OR wellbeing OR "life quality" OR "quality of life" OR benefit* OR outcome* OR impact OR effect* OR "life satisfaction" OR "lifestyle satisfaction" OR "adaptive behaviour" OR "adaptive behaviour") OR AB("well-being" OR wellbeing OR "life quality" OR "quality of life" OR benefit* OR outcome* OR impact OR effect* OR "life satisfaction" OR "lifestyle satisfaction" OR "adaptive behaviour" OR "adaptive behaviour")                                                                                                                                                                                                                                                                                                                                                                                                                                                                                                                                                                                                                                                                                                                                                                                                                                                                                                                                                                                                                                                                                |
| 4 | <b>Economic outcomes</b>                    | MH("Health Care Costs" OR "Cost and Cost Analysis" OR "Models, Economic" OR "Budgets") OR TI(Cost OR costs OR costing OR financial OR financials OR efficiency OR expenditure OR budget* OR expenditure* OR utilisation OR utilization OR economic* OR resource OR resources OR spend OR spending OR 1915(c) OR "1915 (c)" OR funding) OR AB(Cost OR costs OR costing OR financial OR financials OR efficiency OR expenditure OR budget* OR expenditure* OR utilisation OR utilization OR economic* OR resource OR resources OR spend OR spending OR 1915(c) OR "1915 (c)" OR funding)                                                                                                                                                                                                                                                                                                                                                                                                                                                                                                                                                                                                                                                                                                                                                                                                                                                                                                                                                                                   |

Note: the term '1915' was included to identify US studies of the relevant Medicaid waiver to meet the needs of people who prefer to get long-term care and supports in the community rather than an institution (<https://www.cms.gov/Outreach-and-Education/American-Indian-Alaska-Native/AIAN/LTSS-TA-Center/info/national-overview-1915-c-waivers.html>).



## Appendix 2 Grey literature search strategy

### Methodology

The review of grey literature was concerned with non-academic publications, readily available online and included a range of type of documents such as government, statutory organisation, non-statutory organisation (with particular focus on national disability organisations and university based centres of disability studies) policy, guidance, standards or clinical audit documents which include data analysis – either primary data or secondary data analysis. Books, book chapters and PhD and Masters theses were excluded from this review.

The subject experts decided *ex ante* to search based on country and centres of disability studies (and not specific grey databases such as OpenGrey, OpenSIGLE and GreyNet) as these were deemed the strongest source of potentially relevant material. There was no restriction in timeline for grey literature.

The countries searched are those outlined in the IASSIDD Policy and Practice SIRG position paper on deinstitutionalisation - UK, USA/Canada, Australia, Scandinavian. These countries have been at the forefront in implementing policies on and conducting research on deinstitutionalisation. Ireland was also included in this review of grey literature as this is the country of focus for the current review.

The search terms used were the key words set out for the systematic review (see chapter 2.2).

The exclusion criteria for the review of grey sources are set out as follows:

- countries not listed above
- documents that are purely descriptive with no data on quality of life measurement or cost measurement
- documents that do not deal with movement but which assess cross sectional data of people within a particular setting and comparisons across settings but not movement
- PhD/masters and books

Steps in the search for grey literature:

1. Generate a list of policy documents and agencies (national/state disability organisations and academic centres for disability) known to the subject experts on the project team
2. From the list of agencies, two researchers (MA and NW) search within the agency/centre website for key words ‘deinstitutionalisation’, ‘housing’, ‘home’, ‘decongregation’, ‘transition’ as per broad search terms. If not an intellectual disability specific organisation, then the search terms of ‘intellectual disability’, ‘developmental disability’ or ‘learning disability’ will need to be include using AND
3. From the list generated, the researchers proceeded to hand search key policy documents and seminal articles/key authors to further identify grey literature of relevance
4. A full list of reports was collated and circulated to the all subject experts on the project team at this time.
5. This list was reviewed by all subject experts and added to as appropriate based on their knowledge of documents in the area

6. This list was split into two and each report on this list was then reviewed by the two researchers (MA and NW) and categorised as 1: included (data), 2: included (background information), 3. Exclude, 4. Unclear.

Any queries were then discussed and agreed between the two researchers and the report assign to the appropriate category.

| Relevant Grey Literature                                                                                                                                                                                                                                                                                                                                                                                                                                                                                                                                                                               |
|--------------------------------------------------------------------------------------------------------------------------------------------------------------------------------------------------------------------------------------------------------------------------------------------------------------------------------------------------------------------------------------------------------------------------------------------------------------------------------------------------------------------------------------------------------------------------------------------------------|
| Conroy <i>et al.</i> (1985) The Pennhurst Longitudinal Study: A Report of Five Years of Research and Analysis. Retrieved from <a href="https://aspe.hhs.gov/pdf-report/pennhurst-longitudinal-study-combined-report-five-years-research-and-analysis">https://aspe.hhs.gov/pdf-report/pennhurst-longitudinal-study-combined-report-five-years-research-and-analysis</a>                                                                                                                                                                                                                                |
| Conroy, J. and Seiders, J. (1994) 1993 Report on the Well-Being of the Former Residents of Johnstone Training and Research Centre, The New Jersey Strategic Planning Project, Report Number 5. PA: Conroy and Feinstein Associates, Wynnewood. Retrieved from <a href="https://mn.gov/mnddc/parallels2/pdf/90s/93/93-CJN-UNJ.pdf">https://mn.gov/mnddc/parallels2/pdf/90s/93/93-CJN-UNJ.pdf</a>                                                                                                                                                                                                        |
| Cooper and Harkins (2006) Going Home – Keys to Systems Success in Supporting the Return of People to Their Communities from State Facilities. Retrieved from <a href="http://www.nasddd.org/uploads/documents/Going_Home_October_06_Final_%282%29.pdf">http://www.nasddd.org/uploads/documents/Going_Home_October_06_Final_%282%29.pdf</a>                                                                                                                                                                                                                                                             |
| Dixon, R. M., Marsh, H. W. & Craven, R. G. (2004). Moving out: the impact of deinstitutionalisation on salient affective variables for people with mild intellectual disabilities. Proceedings of the Third International Biennial SELF Research Conference: Self-concept, Motivation and Identity: Where to from here? 4-7 July, 2004 (pp. 1-12). Sydney, Australia: SELF Research Centre, University of Sydney. Retrieved from <a href="http://ro.uow.edu.au/cgi/viewcontent.cgi?article=1172&amp;context=edupapers">http://ro.uow.edu.au/cgi/viewcontent.cgi?article=1172&amp;context=edupapers</a> |
| Conroy, J. W., Garrow, J., Fullerton, A., Brown, M., & Vasile, F. (2003). Initial outcomes of community placement for the people who moved from Stockley Center. Center for Outcome Analysis, Narberth, PA. Retrieved from <a href="http://dhss.delaware.gov/dhss/ddd/files/conroyrep.pdf">http://dhss.delaware.gov/dhss/ddd/files/conroyrep.pdf</a>                                                                                                                                                                                                                                                   |
| Conroy, J. W., Lemanowicz, J. A., Feinstein, C. S., & Bernotsky, J. M. (1991). The Connecticut Applied Research Project: 1990 results of the CARC v. Thorne longitudinal study. Retrieved from <a href="http://static1.squarespace.com/static/53dfdc3be4b0a86a2dbf76ae/t/5671ccbdcbed6829d5f191b/1450298557957/1990+Results+of+the+CARC+Vs+Thorne+Longitudinal+Study.pdf">http://static1.squarespace.com/static/53dfdc3be4b0a86a2dbf76ae/t/5671ccbdcbed6829d5f191b/1450298557957/1990+Results+of+the+CARC+Vs+Thorne+Longitudinal+Study.pdf</a>                                                         |

### Appendix 3 CASP Cohort Study Appraisal Questions

This review used the CASP suite of tools (<https://casp-uk.net/casp-tools-checklists/>). Both studies included in the review of cost papers were cohort studies with costs as the outcome of interest, and not analyses in the tradition of economic evaluation.

We therefore used the cohort study appraisal tool, which features 14 questions under 12 headers:

1. Did the study address a clearly focused issue?
2. Was the cohort recruited in an acceptable way?
3. Was the exposure accurately measured to minimise bias?
4. Was the outcome accurately measured to minimise bias?
5. (a) Have the authors identified all important confounding factors?
5. (b) Have they taken account of the confounding factors in the design and/or analysis?
6. (a) Was the follow up of subjects complete enough?
6. (b) Was the follow up of subjects long enough?
7. What are the results of this study?
8. How precise are the results?
9. Do you believe the results?
10. Can the results be applied to the local population?
11. Do the results of this study fit with other available evidence?
12. What are the implications of this study for practice?

## Appendix 4 Studies excluded at quality assessment (both cost and QOL studies)

Supplementary Table Quality-assessed excluded studies

| Study                          | Exclusion Reasons                                                                                                                                                                                                              |
|--------------------------------|--------------------------------------------------------------------------------------------------------------------------------------------------------------------------------------------------------------------------------|
| Bhaumik <i>et al.</i> (2011)   | <ul style="list-style-type: none"> <li>• CASP screening question 2</li> <li>• E.g. no information on ethics, recruitment</li> </ul>                                                                                            |
| Bratt & Johnston (1988)        | <ul style="list-style-type: none"> <li>• CASP screening questions 1 &amp; 2</li> <li>• Aggregated adolescent and adult populations</li> </ul>                                                                                  |
| Conneally <i>et al.</i> (1992) | <ul style="list-style-type: none"> <li>• CASP screening question 2.</li> <li>• Aggregated child and adult populations</li> </ul>                                                                                               |
| Conroy <i>et al.</i> (2003)    | <ul style="list-style-type: none"> <li>• CASP screening question 1 &amp; 2</li> <li>• E.g. PICO difficulties</li> </ul>                                                                                                        |
| Cullen (1995)                  | <ul style="list-style-type: none"> <li>• CASP screening questions 1 &amp; 2</li> <li>• E.g. No aim, ethics, consent or sampling stated.</li> <li>• Difficulties at confirming exact ID population in terms of need.</li> </ul> |
| Dagnan <i>et al.</i> (1995)    | <ul style="list-style-type: none"> <li>• CASP screening question 2</li> <li>• E.g. No ethics or recruitment procedure detailed</li> </ul>                                                                                      |
| Dagnan <i>et al.</i> (1996)    | <ul style="list-style-type: none"> <li>• CASP screening question 2</li> </ul>                                                                                                                                                  |
| Dagnan <i>et al.</i> (1998)    | <ul style="list-style-type: none"> <li>• CASP screening question 2</li> <li>• E.g. No ethics details provided</li> </ul>                                                                                                       |
| Donnelly (1996)                | <ul style="list-style-type: none"> <li>• CASP screening question 2</li> </ul>                                                                                                                                                  |

---

<sup>1</sup> CASP Reference



|                                  |                                                                                                                                                                                 |
|----------------------------------|---------------------------------------------------------------------------------------------------------------------------------------------------------------------------------|
| Donnelly (1997)                  | <ul style="list-style-type: none"> <li>• CASP screening question 2</li> <li>• E.g. no consent</li> </ul>                                                                        |
| Fish & Lobley (2001)             | <ul style="list-style-type: none"> <li>• CASP screening question 1</li> <li>• E.g. PICO not met</li> </ul>                                                                      |
| Fleming & Stenfert-Kroese (1990) | <ul style="list-style-type: none"> <li>• CASP screening question 1 &amp; 2</li> </ul>                                                                                           |
| Forrester - Jones (2002)         | <ul style="list-style-type: none"> <li>• CASP screening question 2</li> <li>• E.g. no ethics, consent, sampling details provided</li> </ul>                                     |
| Hemming <i>et al.</i> (1981)     | <ul style="list-style-type: none"> <li>• CASP screening question 1 &amp; 2</li> </ul>                                                                                           |
| Mansell (1994)                   | <ul style="list-style-type: none"> <li>• CASP screening question 1.</li> <li>• Children in the cohort</li> </ul>                                                                |
| Marlow & Walker (2015)           | <ul style="list-style-type: none"> <li>• CASP screening question 1 and 2</li> </ul>                                                                                             |
| Perry <i>et al.</i> (2011)       | <ul style="list-style-type: none"> <li>• CASP screening question 2.</li> <li>• E.g. not representative of defined population</li> </ul>                                         |
| Roy <i>et al.</i> (1994)         | <ul style="list-style-type: none"> <li>• Did not meet CASP screening question 2</li> <li>• No ethics, statement of sampling, or generalizability, no mention of bias</li> </ul> |
| Sines <i>et al.</i> (2012)       | <ul style="list-style-type: none"> <li>• CASP screening question 1</li> <li>• E.g. no ethical considerations</li> </ul>                                                         |
| Spreat & Conroy (2002)           | <ul style="list-style-type: none"> <li>• CASP screening question 1 &amp; 2</li> </ul>                                                                                           |
| Srivastava & Cooke (1999)        | <ul style="list-style-type: none"> <li>• No reporting of findings interim report; PICO not detailed precisely</li> </ul>                                                        |
| Walker <i>et al.</i> (1995)      | <ul style="list-style-type: none"> <li>• CASP screening question 1.</li> </ul>                                                                                                  |
| Young (2003)                     | <ul style="list-style-type: none"> <li>• CASP screening question 1.</li> </ul>                                                                                                  |

## Appendix 5 Unobtainable studies

Supplementary Table Studies that met eligibility criteria but could not be accessed

| Authors                                                                   | Year | Title                                                                                                                           | Journal                               | Vol | Issue | Pages   |
|---------------------------------------------------------------------------|------|---------------------------------------------------------------------------------------------------------------------------------|---------------------------------------|-----|-------|---------|
| Y. Don; Y. Amir                                                           | 1969 | Institutions for mentally retarded in Israel: Cost structure and budget analysis                                                | Mental Retardation                    | 7   | 3     | 36-39   |
| I. N. Wolfson                                                             | 1970 | Adjustment of institutionalized mildly retarded patients twenty years after return to the community                             | Mental Retardation                    | 8   | 4     | 20-23   |
| A. T. Bjaanes; E. W. Butler                                               | 1974 | Environmental variation in community care facilities for mentally retarded persons                                              | American Journal of Mental Deficiency | 78  | 4     | 429-439 |
| M. Aninger; K. Bolinsky                                                   | 1977 | Levels of independent functioning of retarded adults in apartments                                                              | Mental Retardation                    | 15  | 4     | Dec-13  |
| S. C. McDevitt; P. M. Smith; D. W. Schmidt; M. Rosen                      | 1978 | The deinstitutionalized citizen: Adjustment and quality of life                                                                 | Mental Retardation                    | 16  | 1     | 22-24   |
| A. L. Carsrud; K. B. Carsrud; D. P. Henderson; C. J. Alisch; A. V. Fowler | 1979 | Effects of social and environmental change on institutionalized mentally retarded persons: The relocation syndrome reconsidered | American Journal of Mental Deficiency | 84  | 3     | 266-272 |
| J. C. Intagliata; B. S. Wilder; F. B. Cooley                              | 1979 | Cost comparison of institutional and community based alternatives for mentally retarded persons                                 | Mental Retardation                    | 17  | 3     | 154-156 |
| R. H. Bruininks; F. A. Hauber; M. J. Kudla                                | 1980 | National survey of community residential facilities: A profile of facilities and residents in 1977                              | American Journal of Mental Deficiency | 84  | 5     | 470-478 |
| R. L. Schalock; R. S. Harper; G. Carver                                   | 1981 | Independent living placement: Five years later                                                                                  | American Journal of Mental Deficiency | 86  | 2     | 170-177 |
| J. Intagliata; B. Willer                                                  | 1982 | Reinstitutionalization of mentally retarded persons successfully placed into family-care and group homes                        | American Journal of Mental Deficiency | 87  | 1     | 34-39   |

|                                                                            |          |                                                                                                                                                                |                                                            |    |   |         |
|----------------------------------------------------------------------------|----------|----------------------------------------------------------------------------------------------------------------------------------------------------------------|------------------------------------------------------------|----|---|---------|
| T. Heller                                                                  | 198<br>2 | Social disruption and residential relocation of mentally retarded children                                                                                     | American Journal of Mental Deficiency                      | 87 | 1 | 48-55   |
| W. R. Cook                                                                 | 198<br>3 | Economics of providing services to the mentally retarded                                                                                                       | Mental Retardation & Learning Disability Bulletin          | 11 | 1 | 13-21   |
| L.W. Heal; J. Chadsey-Rusch                                                | 198<br>5 | The Lifestyle Satisfaction Scale (LSS): Assessing individuals' satisfaction with residence, community setting, and associated services                         | Applied Research in Mental Retardation                     | 6  | 4 | 475-490 |
| J. O'Neill; M. Brown; W. Gordon; R. Schonhorn                              | 198<br>5 | The impact of deinstitutionalization on activities and skills of severely/profoundly mentally retarded multiply-handicapped adults                             | Applied Research in Mental Retardation                     | 6  | 3 | 361-371 |
| R. L. Schalock; M. A. Lilley                                               | 198<br>6 | Placement from community-based mental retardation programs: How well do clients do after 8 to 10 years?                                                        | American Journal of Mental Deficiency                      | 90 | 6 | 669-676 |
| D. Felce                                                                   | 198<br>6 | Accommodating adults: with severe and profound mental handicaps: Comparative revenue costs                                                                     | Journal of the British Institute of Mental Handicap (APEX) | 14 | 3 | 104-107 |
| J. Lalonde; A. Marchand; N. Marineau                                       | 198<br>6 | La réinsertion sociale de déficientes intellectuelles résidant en milieu psychiatrique. =The social reintegration of institutionalized mentally retarded women | Revue de Modification du Comportement                      | 16 | 2 | 84-93   |
| N. S. Springer                                                             | 198<br>7 | From institution to foster care: Impact on nutritional status                                                                                                  | American Journal of Mental Deficiency                      | 91 | 4 | 321-327 |
| E. A. Eastwood; G. A. Fisher                                               | 198<br>8 | Skills acquisition among matched samples of institutionalized and community-based persons with mental retardation                                              | American Journal Of Mental Retardation: AJMR               | 93 | 1 | 75-83   |
| R. B. Edgerton                                                             | 198<br>8 | Aging in the community: A matter of choice                                                                                                                     | American Journal on Mental Retardation                     | 92 | 4 | 331-335 |
| J. O'Neill; M. Brown; W. A. Gordon; J. P. Orazem; C. Hoffman; R. Schonhorn | 199<br>0 | Medicaid versus state funding of community residences: Impact on daily life of people with mental retardation                                                  | Mental Retardation                                         | 28 | 3 | 183-188 |

|                                                        |          |                                                                                                                                                  |                                                               |     |   |         |
|--------------------------------------------------------|----------|--------------------------------------------------------------------------------------------------------------------------------------------------|---------------------------------------------------------------|-----|---|---------|
| J. W. Ashbaugh; T. Nerney                              | 199<br>0 | Costs of providing residential and related support services to individuals with mental retardation                                               | Mental Retardation                                            | 28  | 5 | 269-273 |
| C. Jourdan-Ionescu; S. Ionescu; L. Corbeil; C. Rivest  | 199<br>0 | Evaluation de la désinstitutionnalisation: I. La qualité de vie. =Evaluation of deinstitutionalization: I. Quality of life                       | Revue francophone de la déficience intellectuelle             | 1   | 1 | 49-58   |
| P. J. Cunningham; C. D. Mueller                        | 199<br>1 | Individuals with mental retardation in residential facilities: Findings from the 1987 National Medical Expenditure Survey                        | American Journal on Mental Retardation                        | 96  | 2 | 109-117 |
| J. Lord; A. Pedlar                                     | 199<br>1 | Life in the community: Four years after the closure of an institution                                                                            | Mental Retardation                                            | 29  | 4 | 213-221 |
| J. Barlow; N. Kirby                                    | 199<br>1 | Residential satisfaction of persons with an intellectual disability living in an institution or in the community                                 | Australia & New Zealand Journal of Developmental Disabilities | 17  | 1 | Jul-23  |
| B. E. McGuire; G. Choon; E. Akuffo                     | 199<br>1 | Community living for elderly people with an intellectual disability: A pilot study                                                               | Australia & New Zealand Journal of Developmental Disabilities | 17  | 1 | 25-33   |
| R. L. Schalock; L. T. Genung                           | 199<br>3 | Placement from a community-based mental retardation program: A 15-year follow-up                                                                 | American Journal on Mental Retardation                        | 98  | 3 | 400-407 |
| C. A. Knobbe; S. P. Carey; L. Rhodes; R. H. Horner     | 199<br>5 | Benefit-cost analysis of community residential versus institutional services for adults with severe mental retardation and challenging behaviors | American Journal on Mental Retardation                        | 99  | 5 | 533-541 |
| J. Tossebro                                            | 199<br>5 | Impact of size revisited: Relation of number of residents to self-determination and deprivatization                                              | American Journal on Mental Retardation                        | 100 | 1 | 59-67   |
| B. R. Wagner; D. F. Long; M. L. Reynolds; J. R. Taylor | 199<br>5 | Voluntary transformation from an institutionally based to a community-based service system                                                       | Mental Retardation                                            | 33  | 5 | 317-321 |
| A. G. Philaretou; S. Myrianthous                       | 200<br>9 | An exploratory investigation of the quality of life of adults with learning disabilities living in family homes or under residential care        | International Journal of Interdisciplinary Social Sciences    | 4   | 1 | 57-75   |

## Appendix 6 Studies in a language other than English

Supplementary Table Studies in a language other than English

| Title                                                                                                                                                                                                                                  | Authors                                                                    | Published Year | Journal                                                        | Volume | Issue | Pages   |
|----------------------------------------------------------------------------------------------------------------------------------------------------------------------------------------------------------------------------------------|----------------------------------------------------------------------------|----------------|----------------------------------------------------------------|--------|-------|---------|
| [Do residential facilities for mentally retarded people exert an influence on the capacity for autonomy and social integration of their residents?] [French]                                                                           | Beckers, J.                                                                | 1984           | International Journal of Rehabilitation Research               | 7      | 4     | 409-418 |
| La désinstitutionnalisation des personnes déficientes intellectuelles et leur appréciation de la qualité de vie. = Deinstitutionalization of individuals with mental disabilities and their perception of the quality of life [French] | Boudreault, Paul                                                           | 1990           | Revue Francophone de la Déficience Intellectuelle              | 1      | 2     | 147-158 |
| Evaluation de la désinstitutionnalisation: 2. Modifications du niveau intellectuel et des comportements adaptatifs. = Evaluation of deinstitutionalization: II. Changes in intelligence level and adaptive behaviors [French]          | Jourdan-Ionescu, Colette; Ionescu, Serban; Rivest, Christine; Corbeil, Luc | 1990           | Revue Francophone de la Déficience Intellectuelle              | 1      | 2     | 137-146 |
| L'effet de l'intégration sociale sur le comportement adaptatif et sur la diversité des activités. = The effects of social integration on adaptive behavior and on diversification of activities [French]                               | Michaud, Danielle; Horth, Raynald; Roy, Sarto                              | 1992           | Revue Francophone de la Déficience Intellectuelle              | 3      | 1     | 39-48   |
| L'évaluation des besoins et de la qualité de vie d'adultes ayant une déficience intellectuelle. = Assessment of the needs and the quality of life of adults with mental retardation [French]                                           | Lachapelle, Yves; Cadieux, Alain                                           | 1993           | Comportement Humain                                            | 7      | 2     | 117-127 |
| De l'Hôpital Louis-H. Lafontaine À la rue Lafontaine. = From Lafontaine Hospital to Lafontaine Street: Deinstitutionalization of persons with mental disabilities [French]                                                             | Lalonde, Francine; Lamarche, Constance                                     | 1993           | Revue Francophone de la Déficience Intellectuelle              | 4      | 2     | 103-120 |
| [Social support of mentally handicapped adults: effects of degree of handicap and type of residential facility] [German]                                                                                                               | Meins, W.                                                                  | 1993           | Psychiatrische Praxis                                          | 20     | 3     | 106-108 |
| Normalisierte Wohnformen für Menschen mit geistiger Behinderung. Auswirkungen auf die Bewohnerinnen und Bewohner. = Normalized                                                                                                         | Kief, Michael                                                              | 1994           | Vierteljahresschrift für Heilpädagogik und ihre Nachbargebiete | 63     | 1     | 33-45   |

|                                                                                                                                                                                                                                                                                                              |                                                                |      |                                                   |    |        |         |
|--------------------------------------------------------------------------------------------------------------------------------------------------------------------------------------------------------------------------------------------------------------------------------------------------------------|----------------------------------------------------------------|------|---------------------------------------------------|----|--------|---------|
| accommodation for people with intellectual disabilities and the effects on the residents [German]                                                                                                                                                                                                            |                                                                |      |                                                   |    |        |         |
| L'influence du processus de désinstitutionnalisation sur l'intégration sociale de personnes présentant une déficience intellectuelle sévère et profonde. = The influence of the deinstitutionalization process on the social integration of people with severe and profound intellectual deficiency [French] | Paré, Charles; Parent, Ghyslain; Pilon, Wilfrid; Côté, Richard | 1994 | Revue Francophone de la Déficience Intellectuelle | 5  | 2      | 137-154 |
| The Possibilities for Mentally Retarded Persons to Make their Own Choices in Everyday Life [Croatian]                                                                                                                                                                                                        | Bratković, Daniela; Bilić, Marija; Nikolić, Branko             | 2003 | Hrvatska Revija za Rehabilitacijska Istraživanja  | 39 | 2      | 117-127 |
| A study on the life satisfaction of mentally handicapped persons visiting a day care [Japanese]                                                                                                                                                                                                              | Handa, M.; Kusaka, K.; Kanoya, Y.; Sato, C.                    | 2004 | Journal of Japan Academy of Nursing Science       | 23 | 4      | 20-30   |
| Mental health problems and objective indicators of quality of life of adults with intellectual disabilities [Croatian]                                                                                                                                                                                       | Kramarić, M.; Sekušak-Galešev, S.; Bratković, D.               | 2013 | Hrvatska Revija za Rehabilitacijska Istraživanja  | 49 | SUPPL. | 50-63   |
